# Supplementary material
Source: publisher site journal article supplement (https://www.dovepress.com/article/365486)
Supplement: Supplementary file 1 [file get_supplementary_file.php]

**Supplementary Material**

*SLR design:*

| PICOS | Inclusion criteria |
| --- | --- |
| Population | All RP patients |
| Intervention | All pharmacological therapies |
| Comparator | Active comparator  Placebo/sham |
| Outcomes | Epidemiology data for RP  Cost of illness data for RP  Cost of illness data of comorbidities of patients with RP |
| Study design | All, except case reports and letters to the editor |
| Geographical Scope | France, Germany, Italy, Spain, UK |
| Language | English language |

*P: Population; I: Intervention; C: Comparator; O: Outcomes; S: Study Design*

*Search overview:*

| Database | SLR topic | Query | Results |
| --- | --- | --- | --- |
| Medline | Epidemiology | (‘retinitis pigmentosa’) AND ((‘epidemiology’ or ‘comorbidity’ or ‘incidence’ or ‘prevalence’ or ‘disease progression’ or ‘epidemiol*’ or ‘incident’ or ‘prevalent’)) Filters: in the last 10 years | 751 |
| Medline | Cost | (‘retinitis pigmentosa’) AND ((‘cost*’ or ‘budget’ or ‘expenditure’ or ‘resource utili*’ or ‘economic’ or ‘pharmacoeconomic’ or ‘productivity’ or ‘cost’ or ‘costs’ or ‘hospitalisation’ or ‘hospitalization’ or ‘cost of illness’ or ‘direct costs’ or ‘direct cost’ or ‘direct medical cost’ OR ‘direct medical costs’ OR ‘medical direct cost’ OR ‘medical direct costs’ OR ‘direct non medical cost’ OR ‘direct non medical costs’ OR ‘non medical direct cost’ OR ‘non medical direct costs’ OR ‘indirect cost’ OR ‘indirect costs’ OR ‘total cost’ OR ‘total costs’)) Filters: in the last 10 years | 2,172 |
| Embase | Epidemiology | (‘retinitis pigmentosa’/exp OR ‘retinitis pigmentosa’) AND (‘epidemiology’ OR ‘comorbidity’ OR ‘incidence’ OR ‘prevalence’ OR 'disease progression' OR ‘epidemiol*’ OR ‘incident’ OR ‘prevalent’) AND [2011-2021]/publication year | 949 |
| Embase | Cost | ('retinitis pigmentosa'/exp OR 'retinitis pigmentosa') AND ((‘cost*’ OR ‘budget’ OR ‘expenditure’ OR ‘resource’) AND ‘utili*’ OR ‘economic’ OR ‘pharmacoeconomic’ OR ‘productivity’ OR ‘cost’ OR ‘costs’ OR ‘hospitalisation’ OR ‘hospitalization’ OR 'cost of illness' OR 'direct costs' OR 'direct cost' OR 'direct medical cost' OR 'direct medical costs' OR 'medical direct cost' OR 'medical direct costs' OR 'direct non medical cost' OR 'direct non medical costs' OR 'non medical direct cost' OR 'non medical direct costs' OR 'indirect cost' OR 'indirect costs' OR 'total cost' OR 'total costs') AND [2011-2021]/publication year | 200 |
| Cochrane (DARE, NHSEED, HTA) | Epidemiology/cost | ‘retinitis pigmentosa’ | 19 |
| Cochrane (CDSR, CENTRAL) | Epidemiology/cost | ‘retinitis pigmentosa’ (Title Abstract Keyword) | 263 |
| Total | | | **4,354** |

*CDSR: Cochrane Database of Systematic Reviews; CENTRAL: Cochrane Central Register of Controlled Trials; DARE: Database of Abstracts of Reviews of Effects; HTA: Health Technology Assessment; NHSEED: NHS Economic Evaluation Database*
